# Supplementary material for: Diastase assisted green synthesis of size-controllable gold nanoparticles
Source: Royal Society of Chemistry journal article supplement (doi:10.1039/c5ra03117f), 2015-01-01
Supplement: c5ra03117f1.pdf [file c5ra03117f1.pdf]

## Diastase assisted green synthesis of size controllable gold nanoparticles

Sireesh babu Maddinedi<sup>a</sup>, Badal Kumar Mandal<sup>a\*</sup>, Shivendu Ranjan<sup>b</sup>, Nandita Dasgupta<sup>b</sup>

<sup>a</sup>Trace Elements Speciation Research Laboratory, Environmental and Analytical Chemistry Division, School of Advanced Sciences, VIT University, Vellore 632014, India, Fax: +91(416) 224-3092; Tel: +91(416) 240-2339; E-mail: [mbadal@hotmail.com](mailto:mbadal@hotmail.com)

<sup>b</sup>Nano-food Research Group, Instrumental and Food Analysis Laboratory, School of Bio Sciences and Technology, VIT University, Vellore, Tamil Nadu, India.

\*The Corresponding Author

**Table S1:** UV-Visible absorption of AuNPs at different pH

| S. No | pH | Wavelength ( $\lambda_{\max}$ in nm) |
|-------|----|--------------------------------------|
| 1     | 12 | 520                                  |
| 2     | 11 | 532                                  |
| 3     | 10 | 560, 730                             |
| 4     | 9  | 565, 675                             |
| 5     | 8  | 565, 780                             |
| 6     | 7  | 565, 655                             |
| 7     | 6  | 560, 780                             |
| 8     | 5  | 560, 675                             |
| 9     | 4  | 570, 680                             |
| 10    | 3  | 560                                  |
| 11    | 2  | 580                                  |
| 12    | 1  | No peak                              |
